# Supplementary material
Source: HighWire-hosted journal article supplement (http://dmd.aspetjournals.org/highwire/filestream/66413/field_highwire_adjunct_files/0/SUPLEMENTARY_DATA_60590.pdf)
Supplement: SUPLEMENTARY_DATA_60590.pdf [file SUPLEMENTARY_DATA_60590.pdf]

# Modulation of (-)-epicatechin metabolism by co-administration with other polyphenols in Caco-2 cell model

Belén Sanchez-Bridge, Antoine Lévèques, Hequn Li, Emmanuelle Bertschy, Amaury Patin and Lucas Actis-Goretta

## Supplementary Figure 1

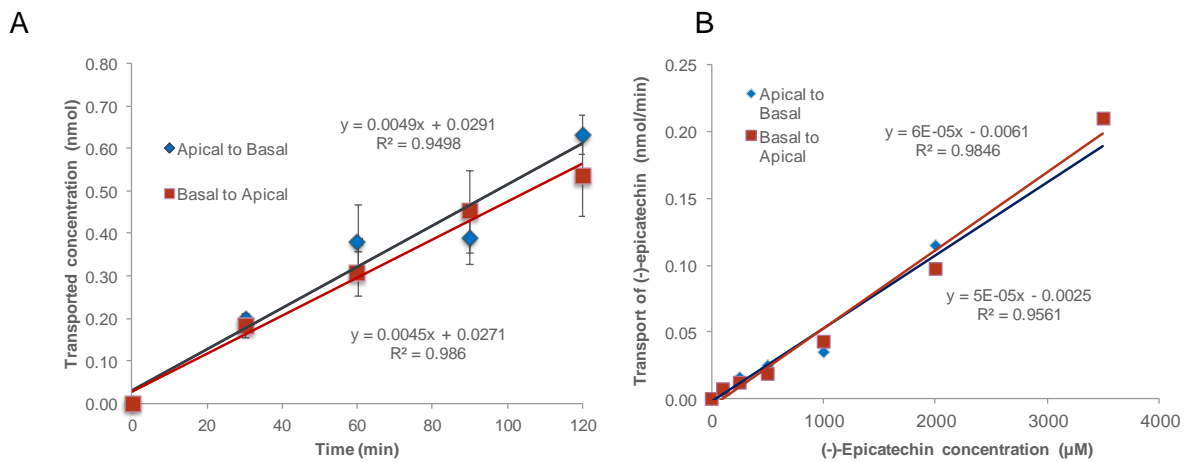

**Figure 1: A)** Transported (-)-epicatechin concentration in the basal or apical compartment after incubating 25, 60, 90 and 120 min. **B)** Transported (-)-epicatechin concentration in the basal or apical compartment after incubating different concentration during 2 h.
